# Supplementary material for: Mass Spectrometry Imaging of Lipids in the Scent Glands of Muskrat (Ondatra zibethicus) in Different Reproductive Statuses
Source: MDPI journal article supplement (doi:10.3390/cells11142228), 2022-07-18
Supplement: s1 [file s1]

## Supplementary data

# Mass Spectrometry Imaging of Lipids in the Scent Glands of Muskrat (*Ondatra zibethicus*) in Different Reproductive Statuses

Wenqian Xie <sup>1</sup>, Shengheng Mu <sup>1</sup>, Jinkun Zhong <sup>1</sup>, Chaoran Zhang <sup>1</sup>, Haolin Zhang <sup>1,\*,\dagger</sup>, Xiaodong Wang <sup>2,3</sup> and Qiang Weng <sup>1,\*,\dagger</sup>

<sup>1</sup> Laboratory of Animal Physiology, College of Biological Sciences and Technology, Beijing Forestry University, Beijing 100083, China; xwq11@bjfu.edu.cn (W.X.); mushengheng@bjfu.edu.cn (S.M.); zhongjinkun2002@bjfu.edu.cn (J.Z.); zhangcr@bjfu.edu.cn (C.Z.)

<sup>2</sup> Key Laboratory of Mass Spectrometry Imaging and Metabolomics (Minzu University of China), State Ethnic Affairs Commission Beijing 10081, China; xiaodong@muc.edu.cn

<sup>3</sup> Centre for Imaging & Systems Biology, College of Life and Environmental Sciences, Minzu University of China, Beijing 100081, China

\* Correspondence: haolinzhang@bjfu.edu.cn (H.Z.); qiangweng@bjfu.edu.cn (Q.W.)

\dagger These authors contributed equally to this work.

## Description

As shown in Figure S1 and Table S1, the total ion chromatogram (TIC) and list of compounds were detected by Gas Chromatograph Mass Spectrometer (GC-MS).

Differential expressed metabolites in scent glands during the breeding and non-breeding seasons in the positive ion mode and negative ion mode were shown in Table S2 and Table S3.

The MS/MS spectrum of the fragment ions from MALDI and LC at  $m/z$  496.3 were shown in Figure S2 and S4. Signals of ion fragments revealed the molecular structure of LysoPC (16:0).

The MS/MS spectrum of the fragment ions from MALDI and LC at  $m/z$  756.5 were shown in Figure S3 and S5. Signals of ion fragments revealed the molecular structure of PC (32:0).

Table S1 The main compounds of scent glands by GC-MS

| Peak# | Height% | Name                                 |
|-------|---------|--------------------------------------|
| 2     | 29.11   | Cyclotridecanone                     |
| 20    | 13.73   | Z-7-Hexadecenoic acid                |
| 1     | 13.66   | Cyclopentadecanone                   |
| 12    | 10.33   | Cyclohexanecarboxylic acid           |
| 15    | 7.29    | 11-Methyl-13-tetradecen-1-ol acetate |
| 16    | 6.07    | E,E-3,13-Octadecadien                |
| 3     | 3.48    | Triacontane                          |
| 11    | 2.89    | Glycidol stearate                    |
| 5     | 1.95    | 10-12-Pentacosadiynoic acid          |
| 10    | 1.91    | Cyclohexanecarboxylic acid           |
| 4     | 1.73    | Cycloheptadecanol                    |
| 6     | 1.14    | OleicAcid                            |
| 7     | 1       | Ethyl Oleate                         |
| 8     | 0.95    | Cyclopentadecanone                   |
| 19    | 0.84    | 9-Octadecen-1-ol                     |
| 17    | 0.84    | 8,11,14-Docosatrienoic acid          |
| 13    | 0.83    | Cyclohexanecarboxylic acid           |
| 14    | 0.8     | Cyclohexanecarboxylic acid           |
| 18    | 0.76    | 1,6,9-Tetradecatriene                |
| 9     | 0.68    | Bicyclo[10.8.0]eicosane              |

Table S2 Differential expressed metabolites in scent glands of muskrats in the positive ion mode

| Compound name                                          | m/z     | rt(min) | MEAN   |       | P VALUE | FOLD<br>CHANGE |
|--------------------------------------------------------|---------|---------|--------|-------|---------|----------------|
|                                                        |         |         | MEAN B | NB    |         |                |
| PC(20:5(5Z,8Z,11Z,14Z,17Z)/20:5(5Z,8Z,11Z,14Z,17Z))    | 887.559 | 3.108   | 0.114  | 0.186 | 0.000   | 0.610          |
| N-Tetracosanoyl-4-sphingenyl-1-O-phosphorylcholine     | 853.644 | 2.268   | 0.010  | 0.006 | 0.027   | 1.691          |
| 1,2-dioleoyl-sn-glycero-3-phosphatidylcholine          | 808.580 | 1.930   | 1.811  | 3.121 | 0.006   | 0.580          |
| PC(16:0/16:0)                                          | 756.525 | 2.354   | 5.929  | 3.311 | 0.031   | 1.791          |
| Phosphatidylethanolamine                               | 748.571 | 2.122   | 0.167  | 0.097 | 0.025   | 1.723          |
| 1-Stearoyl-2-arachidonoyl-sn-glycerol                  | 627.529 | 3.108   | 0.085  | 0.134 | 0.000   | 0.634          |
| Glutathione disulfide                                  | 613.156 | 8.078   | 0.922  | 0.314 | 0.013   | 2.941          |
| Naringin                                               | 545.157 | 2.762   | 0.004  | 0.002 | 0.014   | 2.704          |
| 1-Oleoyl-sn-glycero-3-phosphocholine                   | 544.335 | 3.056   | 0.335  | 0.194 | 0.033   | 1.729          |
| Ile-Met                                                | 542.317 | 3.093   | 0.021  | 0.010 | 0.003   | 2.088          |
| 1-Eicosatrienoyl-sn-glycero-3-phosphoethanolamine      | 504.302 | 3.148   | 0.031  | 0.016 | 0.022   | 1.918          |
| LysoPC(16:0)                                           | 496.313 | 3.026   | 0.009  | 0.004 | 0.028   | 2.493          |
| Suberylglycine                                         | 480.265 | 3.936   | 0.004  | 0.002 | 0.038   | 1.869          |
| Glycochenodeoxycholate                                 | 467.351 | 3.098   | 0.029  | 0.009 | 0.048   | 3.279          |
| 1-Palmitoyl-2-hydroxy-sn-glycero-3-phosphoethanolamine | 454.290 | 3.236   | 0.847  | 0.406 | 0.031   | 2.085          |
| alpha-Tocopherol (Vitamin E)                           | 431.380 | 0.547   | 0.032  | 0.009 | 0.003   | 3.703          |
| Nervonic acid                                          | 430.375 | 2.748   | 0.171  | 0.100 | 0.015   | 1.700          |
| Stearoylcarnitine                                      | 428.370 | 2.543   | 12.765 | 7.198 | 0.001   | 1.773          |
| Theanine                                               | 387.172 | 4.161   | 0.041  | 0.018 | 0.050   | 2.292          |
| Riboflavin                                             | 377.142 | 3.473   | 0.022  | 0.008 | 0.017   | 2.753          |
| Suberic acid                                           | 371.176 | 4.182   | 0.003  | 0.001 | 0.045   | 3.158          |
| Phe-Tyr                                                | 370.172 | 4.183   | 0.014  | 0.004 | 0.040   | 3.214          |

|                                    |         |       |        |       |       |        |
|------------------------------------|---------|-------|--------|-------|-------|--------|
| Lathosterol                        | 369.347 | 0.557 | 0.111  | 0.041 | 0.008 | 2.729  |
| N-Oleylethanolamine                | 326.302 | 0.603 | 0.259  | 0.063 | 0.002 | 4.089  |
| Linoleoyl ethanolamide             | 324.286 | 0.603 | 0.122  | 0.058 | 0.002 | 2.098  |
| 16-Hydroxypalmitic acid            | 314.266 | 0.743 | 0.095  | 0.055 | 0.007 | 1.727  |
| Tyr-Glu                            | 311.121 | 4.856 | 0.004  | 0.002 | 0.001 | 2.126  |
| Deoxyguanosine                     | 309.135 | 5.008 | 0.014  | 0.004 | 0.022 | 3.254  |
| Arg-Met                            | 306.152 | 6.688 | 0.006  | 0.003 | 0.043 | 2.319  |
| Pro-Phe                            | 304.158 | 7.405 | 0.009  | 0.005 | 0.039 | 1.761  |
| N-Acetyl-D-Glucosamine 6-Phosphate | 302.060 | 7.427 | 0.023  | 0.012 | 0.006 | 1.887  |
| Palmitoyl ethanolamide             | 300.287 | 0.616 | 0.430  | 0.122 | 0.016 | 3.538  |
| Tyr-Thr                            | 300.162 | 4.862 | 0.005  | 0.002 | 0.023 | 2.758  |
| Linoleic acid                      | 298.271 | 0.603 | 0.552  | 0.303 | 0.046 | 1.821  |
| isocarboxazid                      | 295.115 | 0.616 | 0.030  | 0.019 | 0.002 | 1.559  |
| Methoprene (S)                     | 293.245 | 0.556 | 0.094  | 0.019 | 0.000 | 4.922  |
| Argininosuccinic acid              | 291.127 | 7.660 | 0.058  | 0.028 | 0.032 | 2.092  |
| His-Glu                            | 285.117 | 6.786 | 0.007  | 0.003 | 0.009 | 2.256  |
| N,N-Dimethylaniline                | 281.135 | 0.616 | 0.056  | 0.034 | 0.001 | 1.647  |
| .gamma.-L-Glu-.epsilon.-L-Lys      | 276.152 | 7.719 | 0.028  | 0.017 | 0.005 | 1.660  |
| L-Pyroglutamic acid                | 276.117 | 6.755 | 0.014  | 0.006 | 0.048 | 2.255  |
| 1,2,3-Benzenetriol                 | 275.050 | 6.648 | 0.031  | 0.016 | 0.018 | 1.991  |
| Phe-Thr                            | 267.139 | 3.933 | 0.022  | 0.006 | 0.045 | 3.648  |
| Met-Asp                            | 265.082 | 6.382 | 0.004  | 0.002 | 0.028 | 2.294  |
| L-Norleucine                       | 263.194 | 4.270 | 0.038  | 0.015 | 0.002 | 2.563  |
| 2-Methylbutyroylcarnitine          | 246.169 | 3.905 | 23.905 | 3.875 | 0.020 | 6.169  |
| Pro-Met                            | 246.106 | 5.927 | 0.013  | 0.017 | 0.018 | 0.735  |
| Gly-Lys                            | 245.155 | 4.067 | 0.132  | 0.006 | 0.047 | 20.768 |

|                                         |         |       |        |       |       |       |
|-----------------------------------------|---------|-------|--------|-------|-------|-------|
| Pro-Glu                                 | 245.110 | 6.792 | 0.016  | 0.008 | 0.017 | 2.010 |
| Monoethylglycylxylidide (MEGX)          | 245.105 | 5.406 | 0.752  | 0.502 | 0.043 | 1.498 |
| Mimosine                                | 243.040 | 7.262 | 0.007  | 0.003 | 0.029 | 1.993 |
| p-CHLOROPHENYLALANINE                   | 241.071 | 3.615 | 0.007  | 0.004 | 0.014 | 1.982 |
| Cantharidin                             | 238.105 | 2.803 | 0.008  | 0.003 | 0.045 | 2.870 |
| Betaine                                 | 235.163 | 4.869 | 0.010  | 0.006 | 0.039 | 1.808 |
| Allocystathionine                       | 223.073 | 7.384 | 0.408  | 0.189 | 0.043 | 2.157 |
| 4-Hydroxy-3-methoxycinnamaldehyde       | 223.032 | 4.369 | 0.002  | 0.000 | 0.030 | 9.188 |
| Pantothenate                            | 220.115 | 4.403 | 0.230  | 0.040 | 0.026 | 5.734 |
| 2,6-Dihydroxybenzoic acid               | 218.040 | 5.135 | 0.004  | 0.008 | 0.042 | 0.522 |
| sn-Glycerol 3-phosphoethanolamine       | 216.061 | 6.404 | 0.238  | 0.080 | 0.032 | 2.967 |
| Leu-Ala                                 | 203.137 | 0.746 | 0.041  | 0.018 | 0.028 | 2.256 |
| 3-Methoxy-4-hydroxyphenylethyleneglycol | 202.105 | 4.403 | 0.018  | 0.003 | 0.020 | 5.649 |
| Val-Ala                                 | 189.122 | 0.748 | 0.023  | 0.010 | 0.026 | 2.406 |
| DL-Indole-3-lactic acid                 | 188.072 | 5.008 | 0.017  | 0.005 | 0.026 | 3.400 |
| Phosphorylcholine                       | 184.072 | 8.093 | 3.135  | 1.732 | 0.008 | 1.810 |
| D-Mannitol                              | 183.082 | 4.883 | 0.034  | 0.019 | 0.009 | 1.822 |
| L-Tyrosine                              | 182.079 | 4.886 | 0.248  | 0.141 | 0.021 | 1.760 |
| L-Glutamine                             | 169.056 | 6.062 | 0.094  | 0.079 | 0.030 | 1.191 |
| D-Xylose                                | 168.089 | 4.170 | 0.007  | 0.003 | 0.012 | 2.208 |
| Pyridoxal (Vitamin B6)                  | 168.063 | 1.624 | 0.010  | 0.004 | 0.012 | 2.417 |
| L-Phenylalanine                         | 166.084 | 4.162 | 0.897  | 0.421 | 0.012 | 2.134 |
| trans-2-Hydroxycinnamic acid            | 165.053 | 4.886 | 0.127  | 0.068 | 0.023 | 1.882 |
| L-Carnitine                             | 162.111 | 5.746 | 15.577 | 8.454 | 0.004 | 1.843 |
| Ribitol                                 | 153.073 | 3.799 | 0.005  | 0.002 | 0.030 | 2.643 |
| L-Methionine                            | 150.056 | 4.601 | 0.185  | 0.083 | 0.007 | 2.243 |

|                            |         |       |       |       |       |       |
|----------------------------|---------|-------|-------|-------|-------|-------|
| Diacetyl                   | 150.054 | 1.836 | 0.043 | 0.015 | 0.002 | 2.925 |
| trans-cinnamate            | 149.061 | 6.468 | 0.026 | 0.015 | 0.014 | 1.760 |
| 4-Pyridoxic acid           | 148.040 | 5.429 | 0.025 | 0.016 | 0.006 | 1.576 |
| 4-Hydroxycinnamic acid     | 147.042 | 4.884 | 0.021 | 0.011 | 0.032 | 1.959 |
| Hypoxanthine               | 137.044 | 2.768 | 4.860 | 2.733 | 0.020 | 1.778 |
| Perillyl alcohol           | 135.115 | 0.559 | 0.125 | 0.065 | 0.017 | 1.938 |
| D-Aspartic acid            | 134.043 | 6.577 | 0.065 | 0.036 | 0.020 | 1.809 |
| Ornithine                  | 133.095 | 8.204 | 0.027 | 0.017 | 0.038 | 1.561 |
| L-Asparagine               | 133.058 | 6.129 | 0.029 | 0.016 | 0.045 | 1.791 |
| L-Leucine                  | 132.101 | 4.269 | 0.610 | 0.290 | 0.002 | 2.105 |
| N-Acetyl-L-alanine         | 132.063 | 4.115 | 0.012 | 0.005 | 0.038 | 2.302 |
| Phenyllactic acid          | 131.047 | 4.164 | 0.024 | 0.011 | 0.012 | 2.201 |
| Nicotinamide               | 123.054 | 0.899 | 5.982 | 2.168 | 0.018 | 2.759 |
| Tyramine                   | 120.079 | 4.164 | 1.472 | 0.674 | 0.013 | 2.185 |
| Phenylacetic acid          | 119.047 | 4.888 | 0.022 | 0.012 | 0.023 | 1.814 |
| Methylmalonic acid         | 119.033 | 2.768 | 0.082 | 0.046 | 0.012 | 1.762 |
| L-Valine                   | 118.085 | 4.863 | 0.331 | 0.244 | 0.045 | 1.355 |
| Dopamine                   | 118.063 | 3.914 | 0.060 | 0.054 | 0.005 | 1.125 |
| L-Proline                  | 116.069 | 5.051 | 2.275 | 1.377 | 0.009 | 1.652 |
| N-Methylhydantoin          | 115.048 | 5.652 | 0.015 | 0.011 | 0.023 | 1.296 |
| L-Serine                   | 106.048 | 6.118 | 0.046 | 0.025 | 0.030 | 1.860 |
| Choline                    | 104.105 | 6.278 | 0.501 | 0.236 | 0.050 | 2.121 |
| DL-2,4-Diaminobutyric acid | 101.069 | 6.067 | 0.027 | 0.021 | 0.046 | 1.238 |
| Pyrrolidine                | 72.080  | 4.867 | 0.180 | 0.096 | 0.007 | 1.870 |

---

Table S3 Differential expressed metabolites in scent glands of muskrats in the negative ion mode

| Compound name                                          | m/z     | rt(min) | MEAN B | MEAN NB | P VALUE | FOLD CHANGE |
|--------------------------------------------------------|---------|---------|--------|---------|---------|-------------|
| 2-Oleoyl-1-stearoyl-sn-glycero-3-phosphoserine         | 788.546 | 3.164   | 0.376  | 0.683   | 0.010   | 0.550       |
| 1-Palmitoyl-2-oleoyl-phosphatidylglycerol              | 747.517 | 2.309   | 0.026  | 0.061   | 0.000   | 0.427       |
| Glutathione disulfide                                  | 611.147 | 8.076   | 1.556  | 0.620   | 0.016   | 2.509       |
| L-Palmitoylcarnitine                                   | 458.348 | 2.652   | 0.610  | 0.225   | 0.002   | 2.718       |
| 1-Palmitoyl-2-hydroxy-sn-glycero-3-phosphoethanolamine | 452.279 | 3.233   | 1.195  | 0.704   | 0.032   | 1.698       |
| Fludrocortisone acetate                                | 443.194 | 3.905   | 0.006  | 0.001   | 0.020   | 5.008       |
| 1-Oleoyl-sn-glycerol 3-phosphate                       | 435.251 | 3.095   | 0.013  | 0.005   | 0.019   | 2.449       |
| Glycolithocholic acid                                  | 432.314 | 0.660   | 0.175  | 0.052   | 0.038   | 3.352       |
| Tetracosanoic acid                                     | 427.378 | 0.782   | 0.021  | 0.011   | 0.012   | 1.868       |
| Stearoylcarnitine                                      | 426.358 | 2.616   | 0.098  | 0.049   | 0.001   | 2.001       |
| Riboflavin                                             | 375.130 | 3.468   | 0.008  | 0.004   | 0.020   | 2.165       |
| 20-hydroxy-PGF2a                                       | 369.220 | 0.796   | 0.204  | 0.012   | 0.046   | 17.162      |
| Androsterone sulfate                                   | 369.174 | 0.605   | 0.099  | 0.069   | 0.013   | 1.439       |
| Pyrethrosin                                            | 343.090 | 6.971   | 0.007  | 0.004   | 0.014   | 1.828       |
| Salidroside                                            | 337.062 | 6.488   | 0.011  | 0.015   | 0.015   | 0.714       |
| 5(S)-HpETE                                             | 335.222 | 0.788   | 0.035  | 0.053   | 0.035   | 0.648       |
| Prostaglandin E1                                       | 335.222 | 2.661   | 0.039  | 0.008   | 0.026   | 5.001       |
| (+)-12-HETE                                            | 319.228 | 0.772   | 0.253  | 0.601   | 0.049   | 0.421       |
| N-Acetylglucosamine 1-phosphate                        | 300.049 | 7.327   | 0.237  | 0.176   | 0.033   | 1.351       |
| L-Arabinono-1,4-lactone                                | 295.227 | 3.118   | 0.025  | 0.012   | 0.039   | 2.062       |
| Palmitic acid                                          | 255.234 | 0.750   | 89.598 | 63.163  | 0.023   | 1.419       |
| cis-9-Palmitoleic acid                                 | 253.218 | 0.744   | 43.476 | 15.598  | 0.031   | 2.787       |
| alpha-hydroxy myristic acid                            | 243.197 | 1.210   | 0.104  | 0.061   | 0.028   | 1.715       |

|                                |         |       |       |       |       |       |
|--------------------------------|---------|-------|-------|-------|-------|-------|
| 3,4,5-Trimethoxycinnamic acid  | 219.062 | 6.868 | 0.006 | 0.003 | 0.039 | 1.901 |
| Pantothenate                   | 218.104 | 4.406 | 0.735 | 0.114 | 0.015 | 6.436 |
| L-Tryptophan                   | 203.083 | 4.193 | 0.374 | 0.142 | 0.047 | 2.632 |
| Acetylcarnitine                | 202.108 | 2.650 | 0.402 | 0.142 | 0.009 | 2.827 |
| Propionylglycine               | 190.072 | 4.080 | 0.008 | 0.003 | 0.005 | 3.020 |
| Azelaic acid                   | 187.097 | 5.581 | 0.023 | 0.042 | 0.007 | 0.546 |
| D-Sorbitol                     | 181.071 | 4.855 | 0.197 | 0.096 | 0.021 | 2.056 |
| L-Tyrosine                     | 180.068 | 4.887 | 0.735 | 0.438 | 0.035 | 1.679 |
| Pyridoxal (Vitamin B6)         | 166.051 | 1.614 | 0.065 | 0.036 | 0.011 | 1.805 |
| L-Phenylalanine                | 164.072 | 4.162 | 1.756 | 0.887 | 0.017 | 1.981 |
| L-Galactono-1,4-lactone        | 159.122 | 3.906 | 0.007 | 0.003 | 0.042 | 2.703 |
| L-Methionine                   | 148.044 | 4.595 | 0.109 | 0.049 | 0.015 | 2.240 |
| D-Arabinono-1,4-lactone        | 147.030 | 1.343 | 0.081 | 0.025 | 0.018 | 3.263 |
| L-Malic acid                   | 133.014 | 7.117 | 0.515 | 0.310 | 0.021 | 1.664 |
| D-Aspartic acid                | 132.030 | 6.583 | 0.344 | 0.235 | 0.038 | 1.461 |
| Hydroxyisocaproic acid         | 131.071 | 2.470 | 0.494 | 0.253 | 0.033 | 1.951 |
| L-Leucine                      | 130.088 | 4.270 | 2.598 | 1.405 | 0.006 | 1.850 |
| N-Acetyl-L-alanine             | 130.051 | 4.119 | 0.036 | 0.017 | 0.042 | 2.069 |
| L-Threonine                    | 118.051 | 5.728 | 0.082 | 0.048 | 0.012 | 1.692 |
| 2-Hydroxy-3-methylbutyric acid | 117.056 | 2.704 | 0.912 | 0.316 | 0.006 | 2.888 |
| Methylmalonic acid             | 117.019 | 1.356 | 0.098 | 0.018 | 0.016 | 5.546 |
| L-Valine                       | 116.072 | 4.866 | 0.501 | 0.298 | 0.013 | 1.682 |
| L-Proline                      | 114.057 | 5.043 | 0.393 | 0.219 | 0.010 | 1.794 |
| L-Serine                       | 104.036 | 6.117 | 0.144 | 0.095 | 0.049 | 1.520 |
| 2-hydroxy-butanoic acid        | 103.040 | 4.447 | 0.023 | 0.009 | 0.030 | 2.525 |
| L-Alanine                      | 88.040  | 6.583 | 0.039 | 0.025 | 0.041 | 1.569 |

---



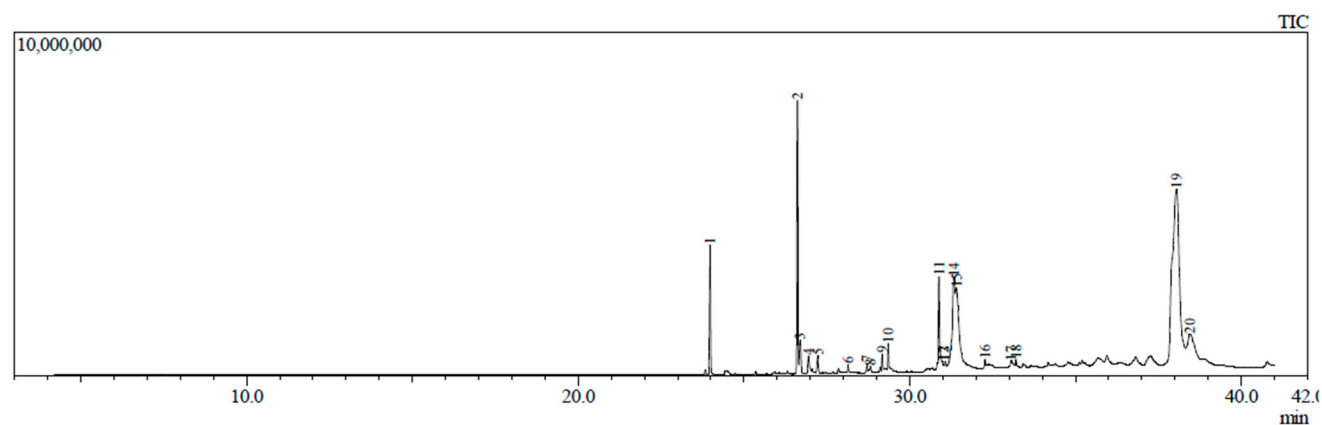

| Peak Report TIC |        |        |        |           |        |          |         |       |      |                                         |  |
|-----------------|--------|--------|--------|-----------|--------|----------|---------|-------|------|-----------------------------------------|--|
| Peak#           | R.Time | I.Time | F.Time | Area      | Area%  | Height   | Height% | A/H   | Mark | Name                                    |  |
| 1               | 23.978 | 23.917 | 24.033 | 8636844   | 5.31   | 3779079  | 12.59   | 2.29  |      | Cyclopentadecanone                      |  |
| 2               | 26.613 | 26.558 | 26.658 | 17461468  | 10.73  | 7970540  | 26.55   | 2.19  |      | Cyclotridecanone                        |  |
| 3               | 26.690 | 26.658 | 26.767 | 3145376   | 1.93   | 957788   | 3.19    | 3.28  | V    | Tricyclo[20.8.0.0(7,16)]triacontane, 11 |  |
| 4               | 26.948 | 26.892 | 27.025 | 1502948   | 0.92   | 485811   | 1.62    | 3.09  |      | Cycloheptadecanol                       |  |
| 5               | 27.225 | 27.167 | 27.292 | 1342243   | 0.82   | 524439   | 1.75    | 2.56  |      | 10-12-Pentacosadiynoic acid             |  |
| 6               | 28.145 | 28.108 | 28.192 | 456126    | 0.28   | 235323   | 0.78    | 1.94  |      | Ethyl Oleate                            |  |
| 7               | 28.706 | 28.667 | 28.742 | 556099    | 0.34   | 267192   | 0.89    | 2.08  |      | 1-Hydroxycyclododecanecarbonitrile      |  |
| 8               | 28.815 | 28.742 | 28.875 | 617832    | 0.38   | 187130   | 0.62    | 3.30  | V    | Bicyclo[10.8.0]eicosane, (E)-           |  |
| 9               | 29.170 | 29.133 | 29.217 | 973240    | 0.60   | 490722   | 1.63    | 1.98  | V    | Cyclohexanecarboxylic acid, undec-10    |  |
| 10              | 29.350 | 29.217 | 29.400 | 1404886   | 0.86   | 736041   | 2.45    | 1.91  | V    | Glycidol stearate                       |  |
| 11              | 30.881 | 30.792 | 30.975 | 7323240   | 4.50   | 2710124  | 9.03    | 2.70  |      | Cyclohexanecarboxylic acid, undec-10    |  |
| 12              | 31.000 | 30.975 | 31.033 | 571782    | 0.35   | 218769   | 0.73    | 2.61  | V    | Cyclohexanecarboxylic acid, decyl est   |  |
| 13              | 31.074 | 31.033 | 31.125 | 671325    | 0.41   | 209443   | 0.70    | 3.21  | V    | Cyclohexanecarboxylic acid, undec-10    |  |
| 14              | 31.331 | 31.125 | 31.375 | 16081630  | 9.88   | 2616908  | 8.72    | 6.15  | V    | 11-Methyl-13-tetradecen-1-ol acetate    |  |
| 15              | 31.412 | 31.375 | 31.708 | 16082224  | 9.88   | 2289940  | 7.63    | 7.02  | V    | 9-Cycloheptadecen-1-ol                  |  |
| 16              | 32.273 | 32.233 | 32.308 | 457693    | 0.28   | 219143   | 0.73    | 2.09  |      | 8,11,14-Docosatrienoic acid, methyl e   |  |
| 17              | 33.050 | 33.017 | 33.175 | 837609    | 0.51   | 166514   | 0.55    | 5.03  |      | 7-Octylidenebicyclo[4.1.0]heptane       |  |
| 18              | 33.203 | 33.175 | 33.258 | 478224    | 0.29   | 203232   | 0.68    | 2.35  | V    | Oleyl alcohol, methyl ether             |  |
| 19              | 38.046 | 37.783 | 38.325 | 73734330  | 45.30  | 5003054  | 16.67   | 14.74 |      | Z-7-Hexadecenoic acid                   |  |
| 20              | 38.444 | 38.325 | 38.758 | 10421441  | 6.40   | 745290   | 2.48    | 13.98 | V    | d-Norandrostane (5.alpha.,14.alpha.)    |  |
|                 |        |        |        | 162756560 | 100.00 | 30016482 | 100.00  |       |      |                                         |  |

Library

Figure S1. Summary report showing the total ion chromatogram (TIC) and list of compounds detected by Gas Chromatograph Mass Spectrometer (GC-MS)

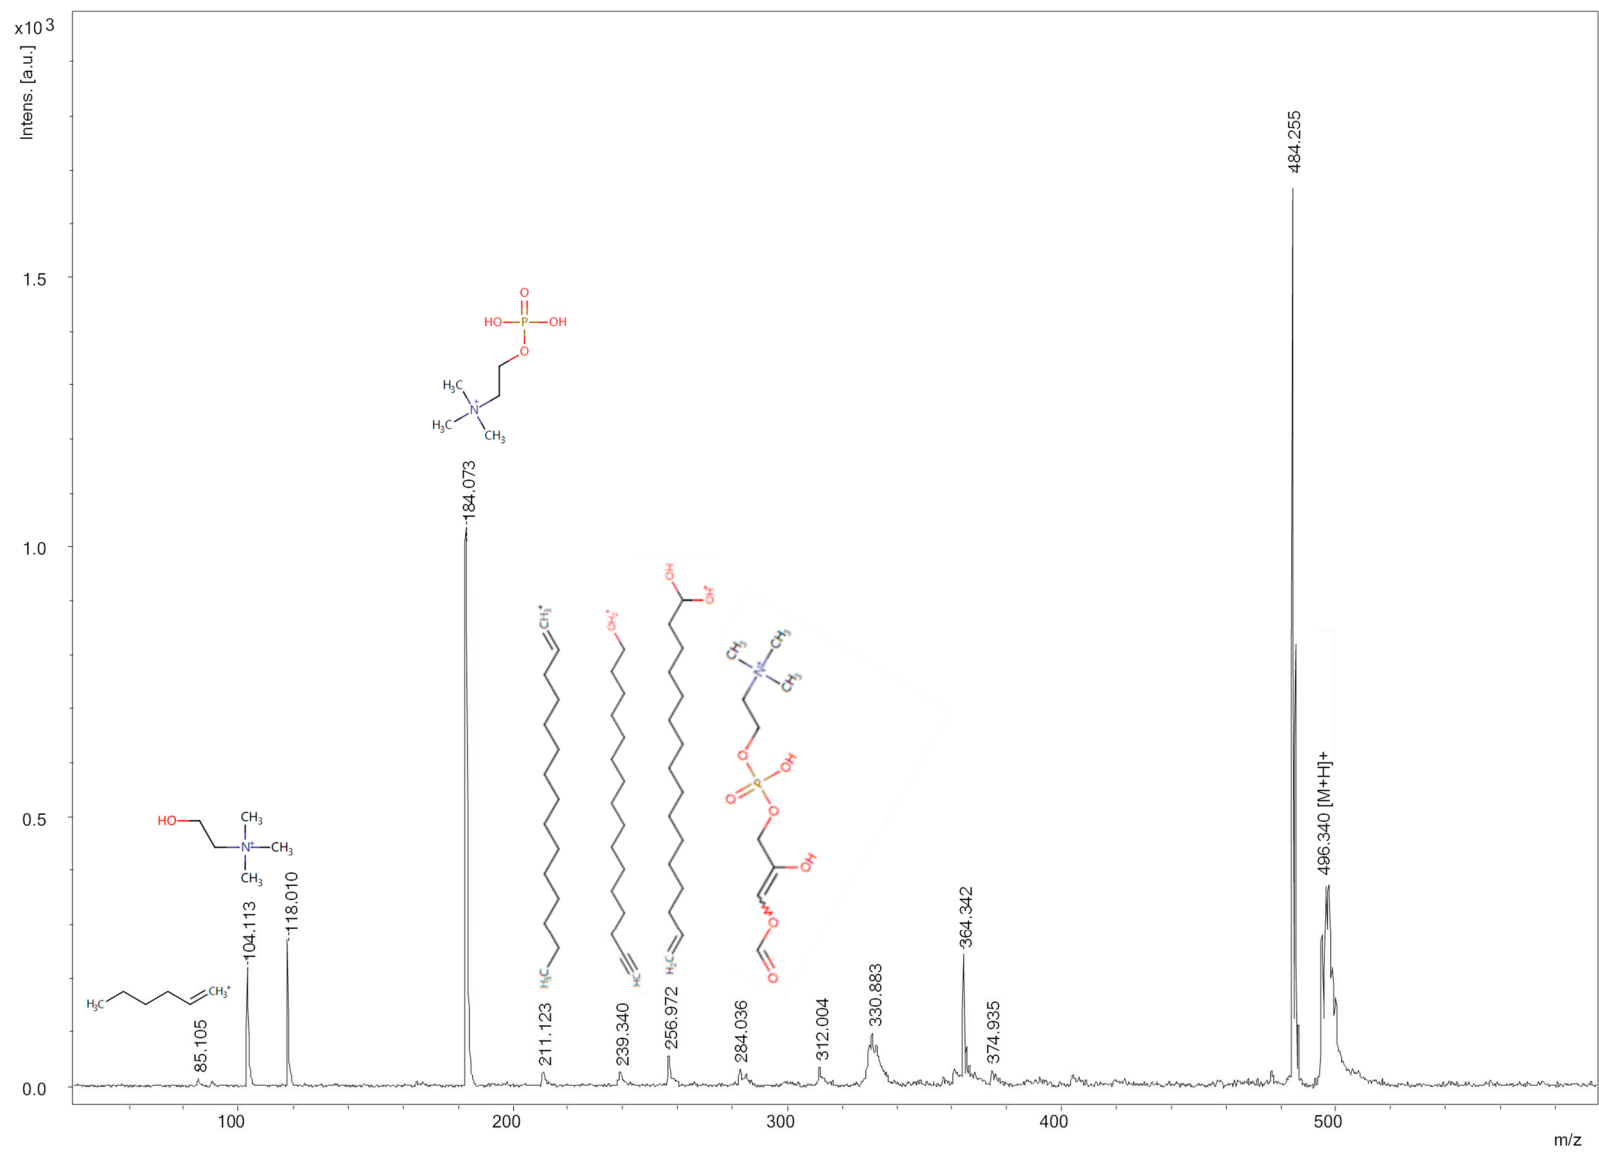

Figure S2. The MS/MS spectrum of  $m/z$  496.3 acquired from MALDI.



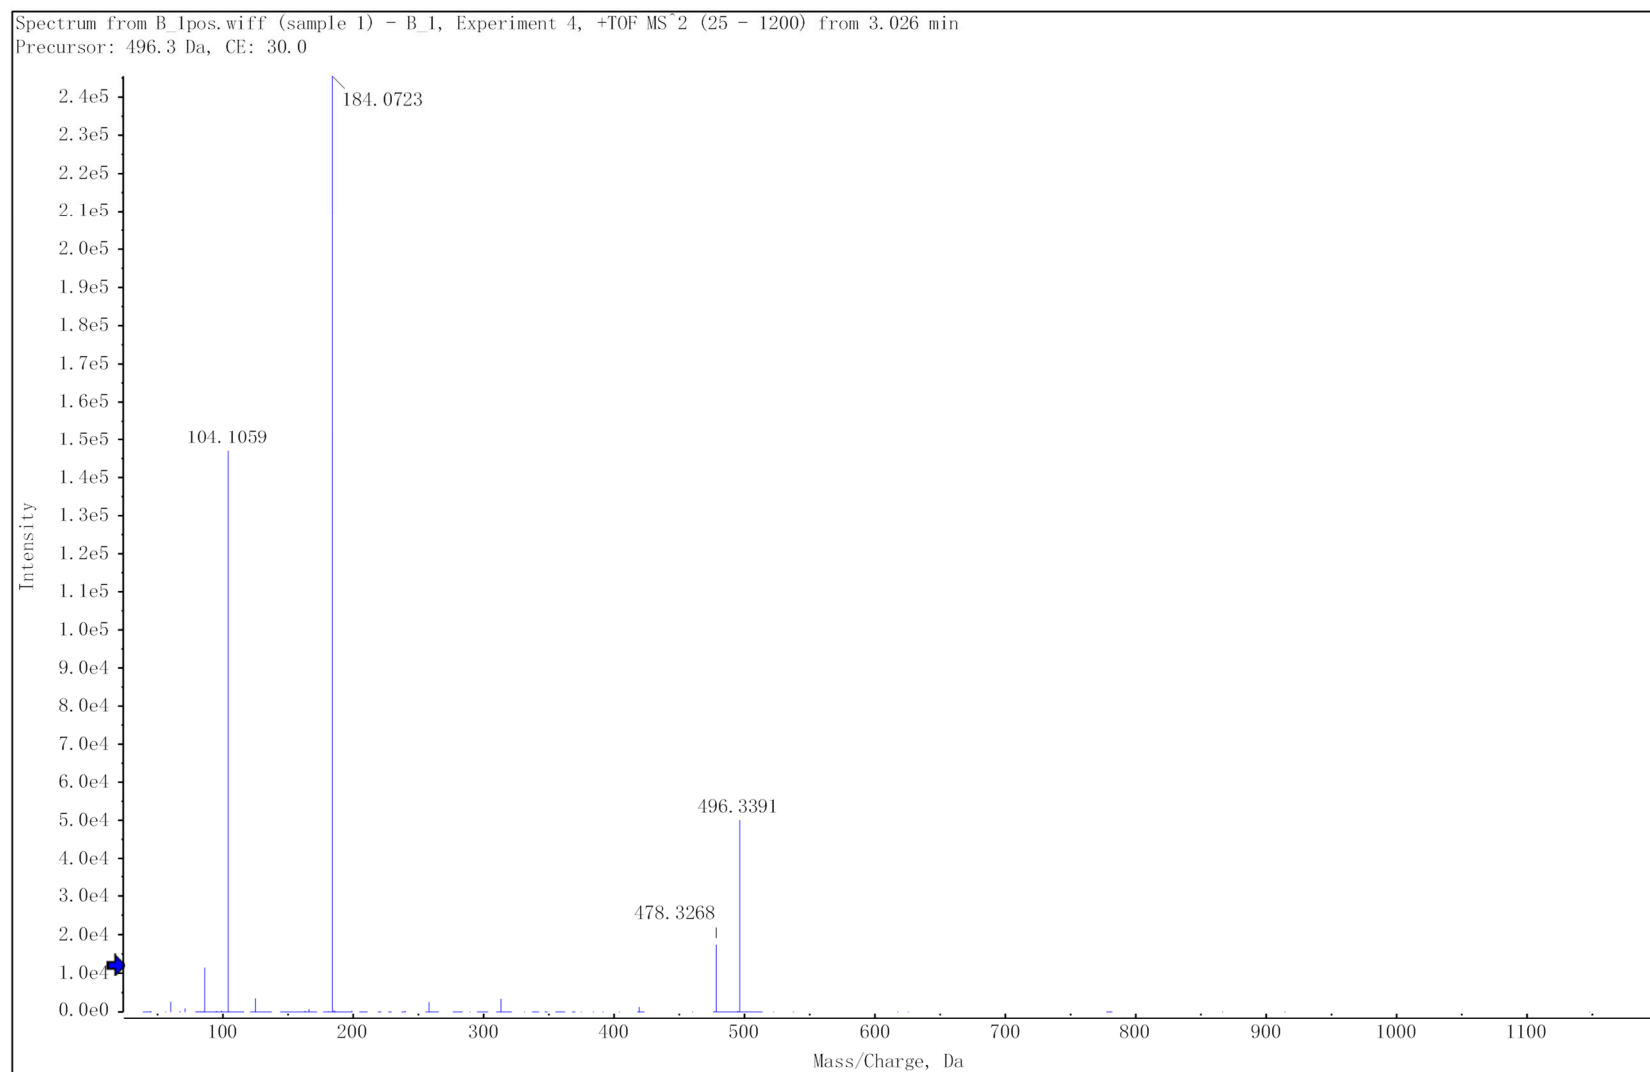

Figure S4. The MS/MS spectrum of  $m/z$  496.3 acquired from LC.

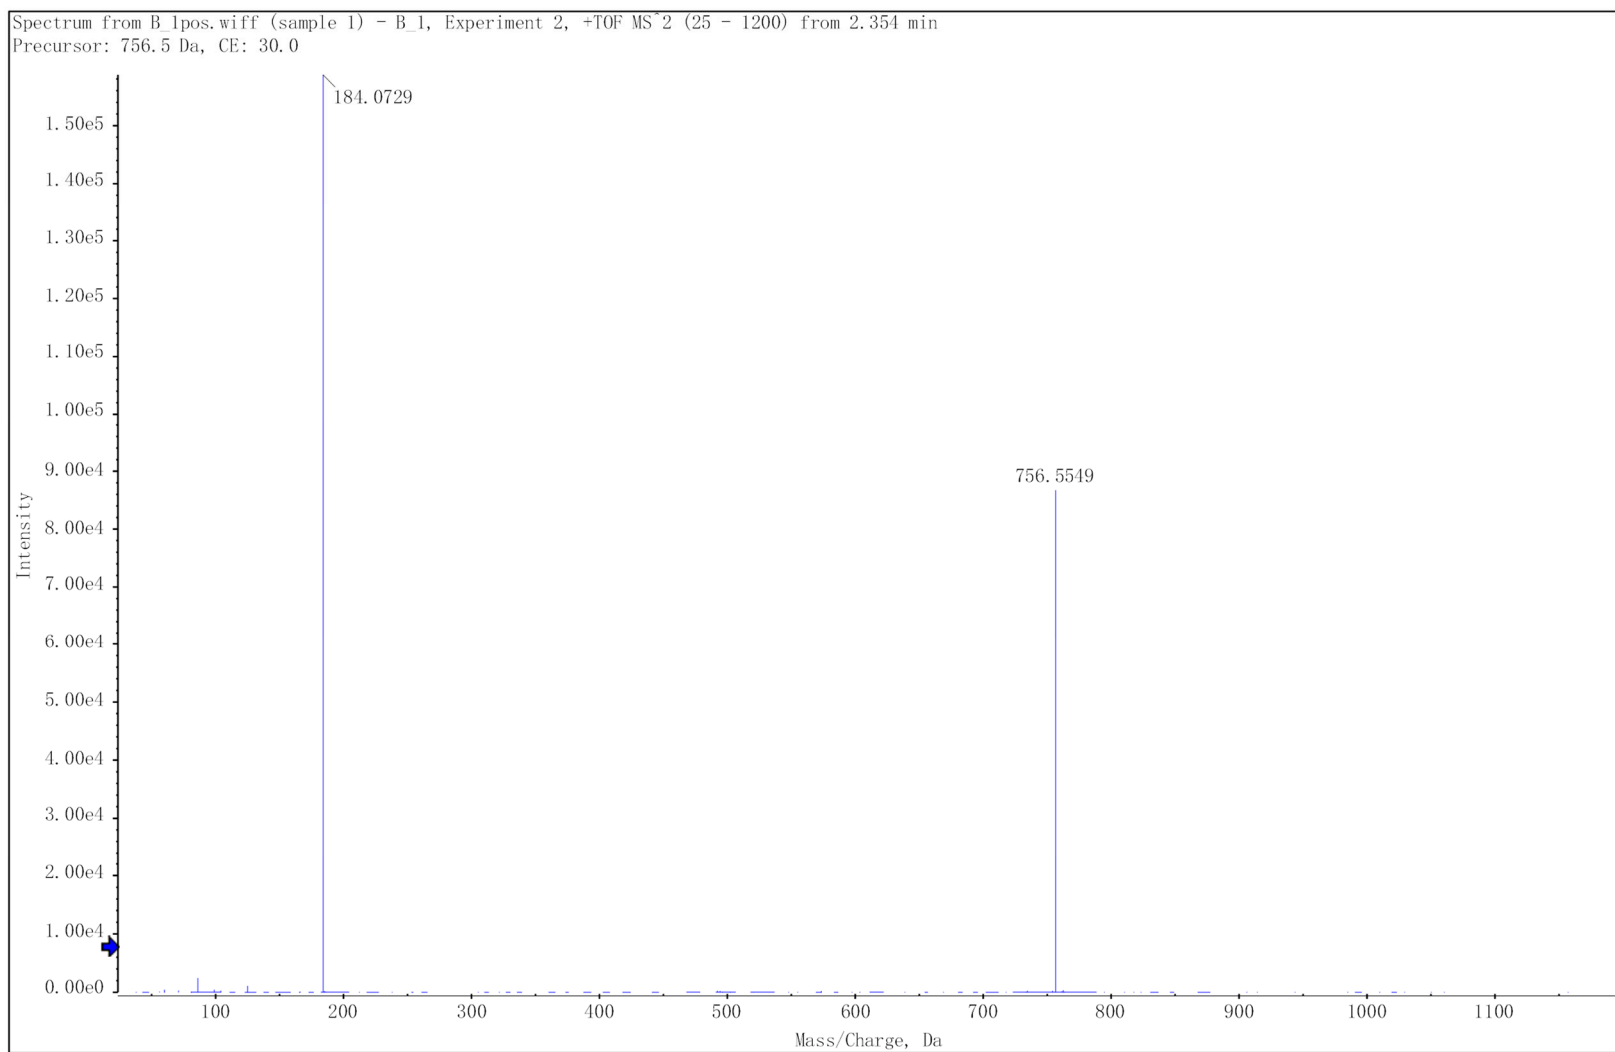

Figure S5. The MS/MS spectrum of  $m/z$  756.5 acquired from LC.
